# Supplementary material for: Cyanocobalamin prevents cardiomyopathy in type 1 diabetes by modulating oxidative stress and DNMT-SOCS1/3-IGF-1 signaling
Source: PubMed Central journal article supplement (PMC8222371; doi:10.1038/s42003-021-02291-y), 2021-06-23
Supplement: 42003_2021_2291_MOESM2_ESM.pdf [file 42003_2021_2291_MOESM2_ESM.pdf]

## Supplementary Information

**Supplemental Table 1.** Primers and probes for quantification of mRNA with real-time quantitative reverse transcription-PCR.

| Gene Symbol  | Primer/Probe | Sequence                                 |
|--------------|--------------|------------------------------------------|
| <i>Actb</i>  | (Fwd primer) | 5'-AAGAGCTATGAGCTGCCTGA-3'               |
|              | (Rev primer) | 5'-ACGGATGTCAACGTCACACT-3'               |
|              | (Probe)      | 5'-FAM-CACTATTGGCAACGAGCGGTTCCG-Tamra-3' |
| <i>Socs3</i> | (Fwd primer) | 5'-CTTTGTAGACTTCACGGCTG-3'               |
|              | (Rev primer) | 5'-TATGGTCCCCGAGGCGAG-3'                 |
|              | (Probe)      | 5'-FAM-AGTGGCTCGCGCTGCGCCCAGA-Tamra-3'   |
| <i>Myh6</i>  | (Fwd primer) | 5'-CCAAGTTCGACAAGATCGAG-3'               |
|              | (Rev primer) | 5'-CCGAGTAGGTATAGATCATC-3'               |
|              | (Probe)      | 5'-FAM-TGGCCATGCTGACCTTCCTGCA-Tamra-3'   |
| <i>Myh7</i>  | (Fwd primer) | 5'-TTGAGAATCCAAGGCTCAGC-3'               |
|              | (Rev primer) | 5'-TGAGGTCAAAGGGCCTGGT-3'                |
|              | (Probe)      | 5'-FAM-TGCCTCCAGCCTCTCCTTCTCAGA-Tamra-3' |
| <i>Trp53</i> | (Fwd primer) | 5'-TGCTCCGATGGTGATGGCCT-3'               |
|              | (Rev primer) | 5'-TGTGGCGAAAAGTCTGCCTG-3'               |
|              | (Probe)      | 5'-FAM-TTGGCACCAATGTCCCGGCT-Tamra-3'     |

The primers and probes for *Igf1*, *Socs1*, *Dnmt1*, *Dnmt3a* and *Dnmt3b* were from TaqMan™ Gene Expression Assays (Thermo Fisher Scientific).

Suppl. Fig. 1: Oral high dose B12 improves cardiac function in *Elmo1<sup>H/H</sup> Ins2<sup>Akita/+</sup>* mice.

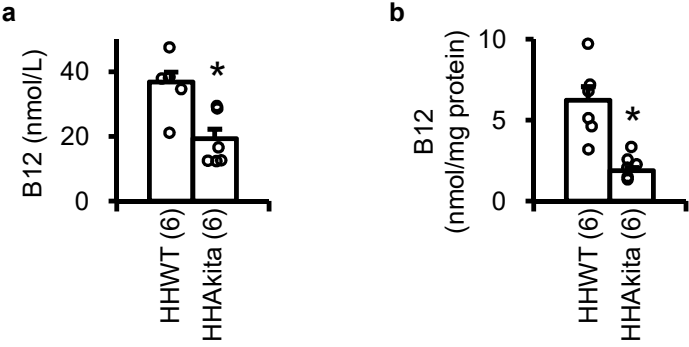

**a** Plasma levels of B12 in HHWT and HHAKita mice. **b** Cardiac levels of B12 in HHWT and HHAKita mice. Numbers in the axis label indicate the number of animals studied. HHWT, *Elmo1<sup>H/H</sup> Ins2<sup>+/+</sup>*; HHAKita, *Elmo1<sup>H/H</sup> Ins2<sup>Akita/+</sup>*; \*,  $P < 0.05$  vs. HHWT by Student's t-test; TL, tibia length.

**Suppl. Fig. 2: Effects of orally administered B12 (10 mg/kg/d) on the cardiac function in the *Elmo1*<sup>+/+</sup> *Ins2*<sup>Akita/+</sup> mice at age 16 weeks.**

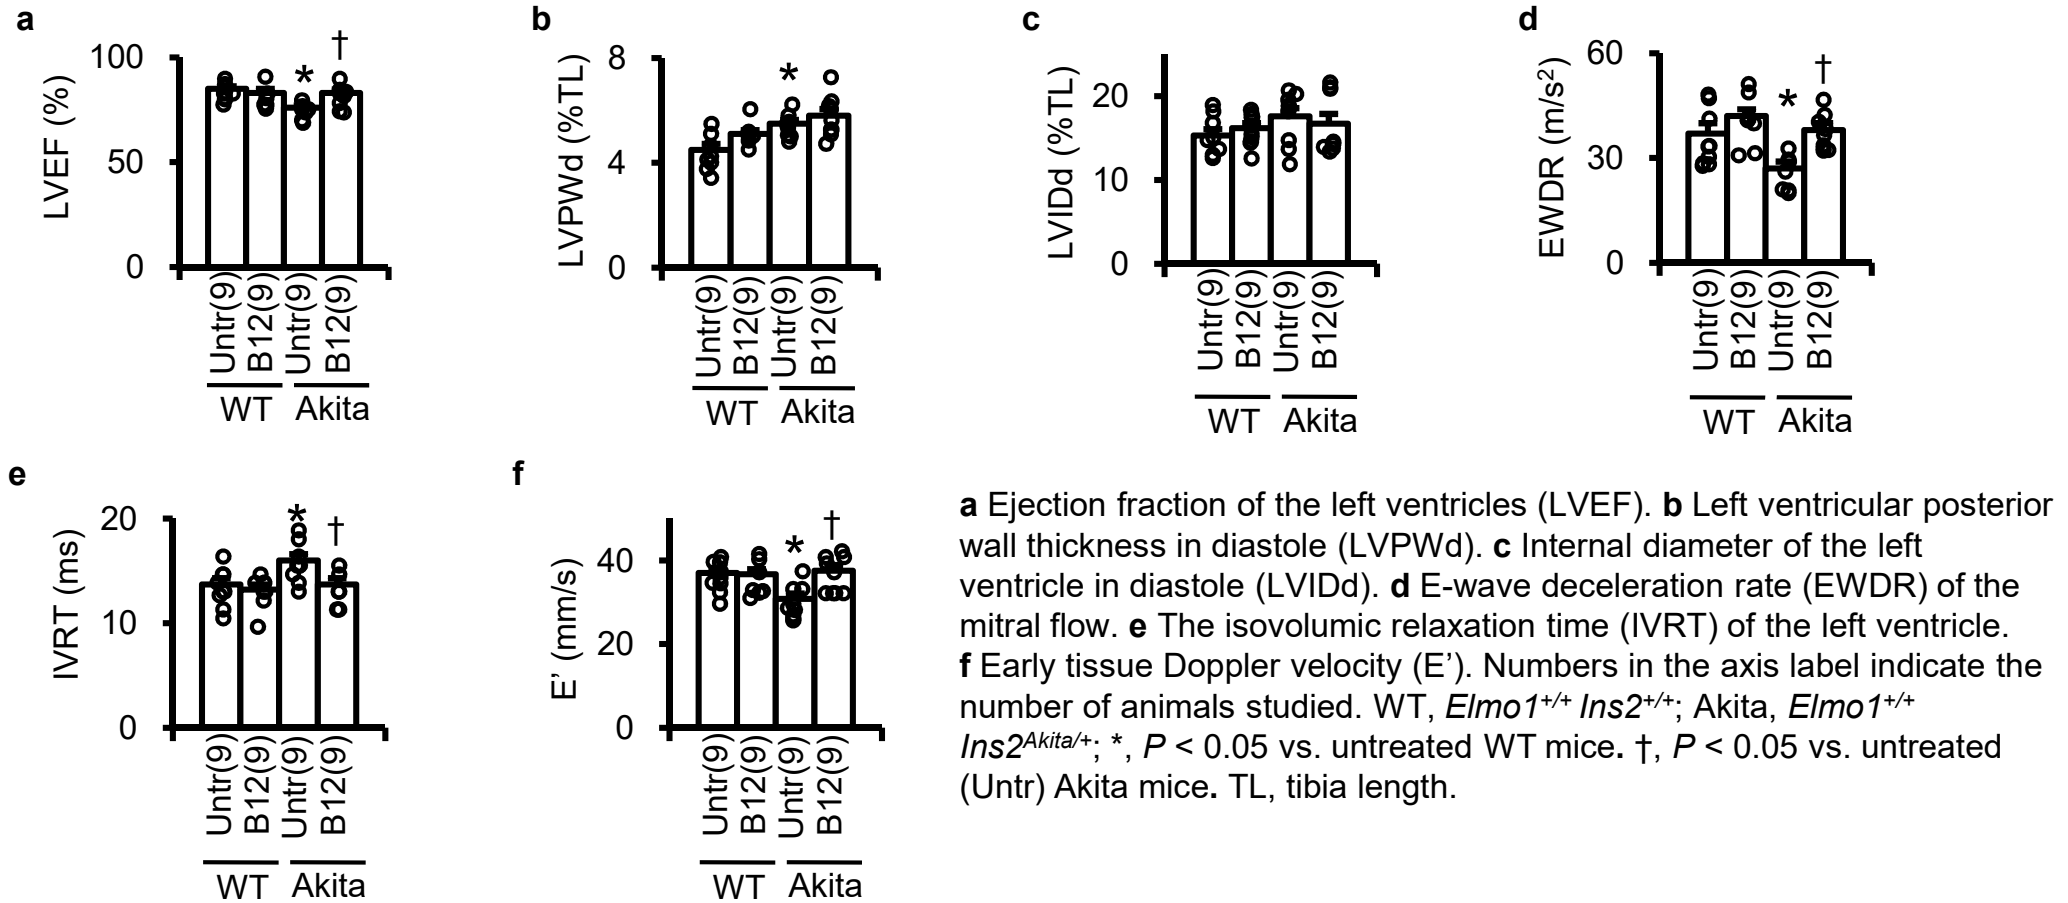

**Suppl. Fig. 3: Cardioprotective effects of B12 (10 mg/kg/d) were significantly greater than the other antioxidants N-acetyl-L-cysteine (NAC; 1000 mg/kg/d) and tempol (Tem; 200 mg/kg/d) in *Elmo1<sup>H/H</sup>Ins2<sup>Akita/+</sup>* mice.**

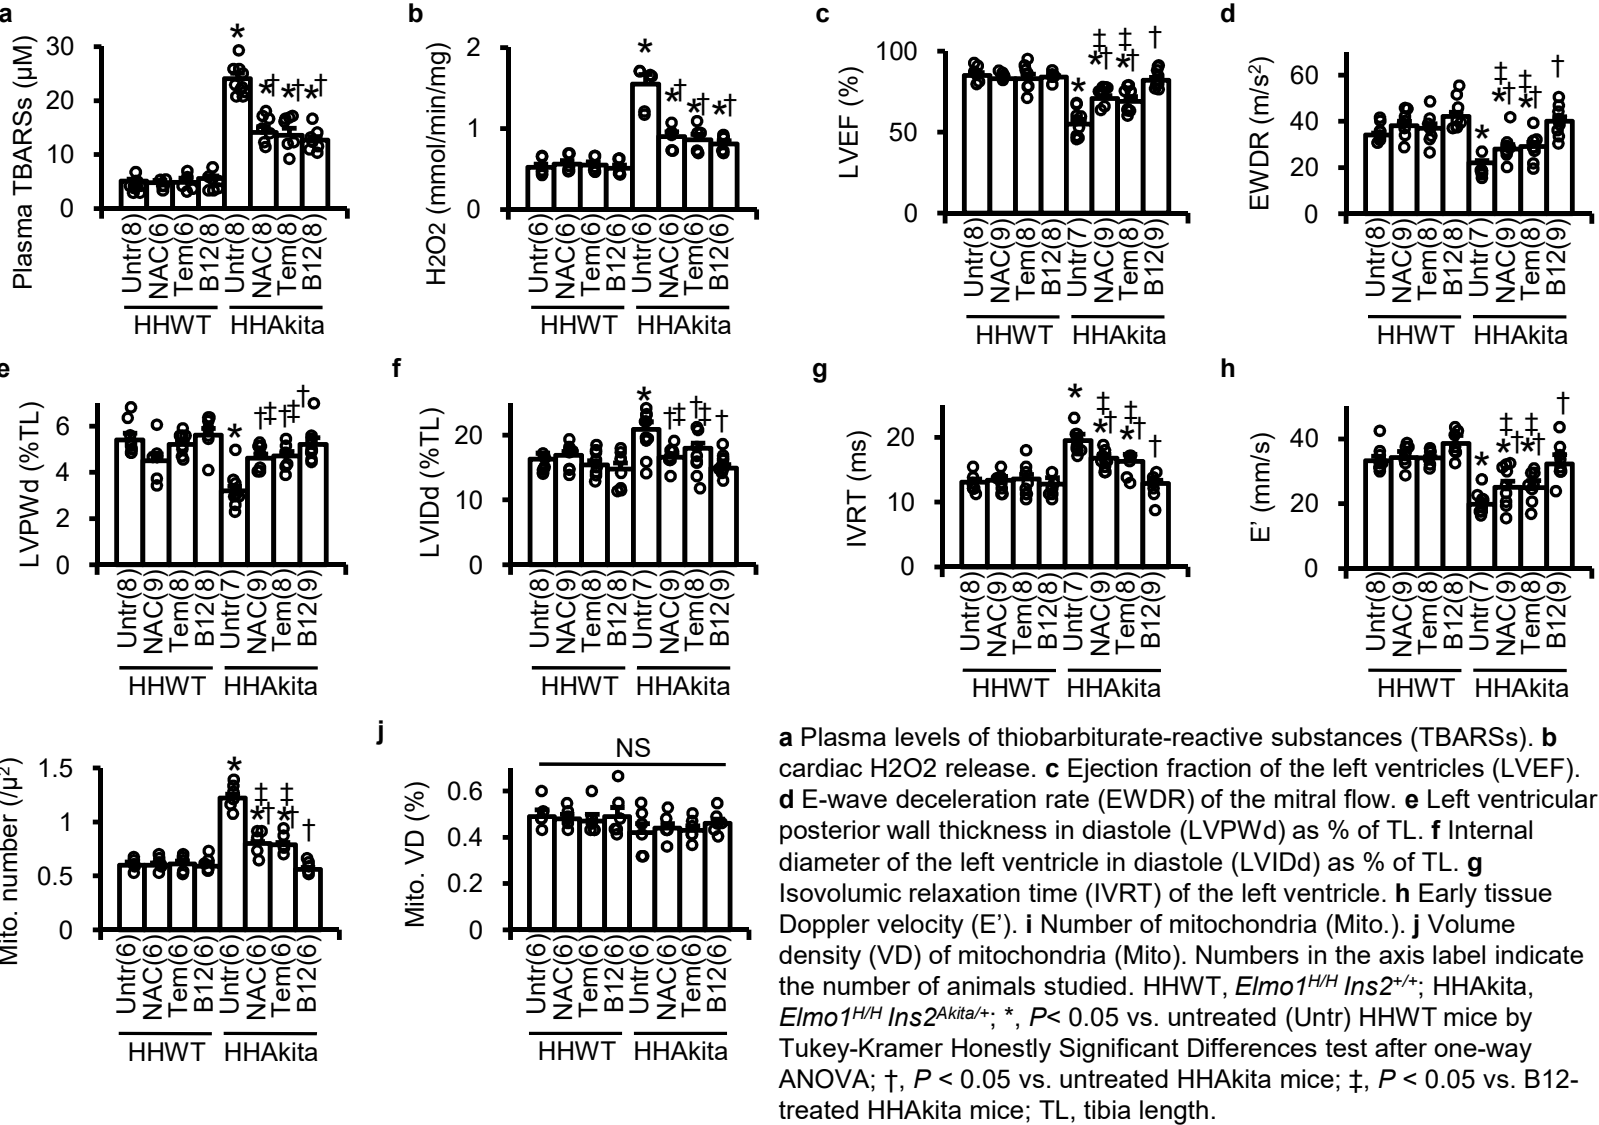

**a** Plasma levels of thiobarbiturate-reactive substances (TBARSs). **b** cardiac  $\text{H}_2\text{O}_2$  release. **c** Ejection fraction of the left ventricles (LVEF). **d** E-wave deceleration rate (EWDR) of the mitral flow. **e** Left ventricular posterior wall thickness in diastole (LVPWd) as % of TL. **f** Internal diameter of the left ventricle in diastole (LVIDd) as % of TL. **g** Isovolumic relaxation time (IVRT) of the left ventricle. **h** Early tissue Doppler velocity ( $E'$ ). **i** Number of mitochondria (Mito.). **j** Volume density (VD) of mitochondria (Mito). Numbers in the axis label indicate the number of animals studied. HHWT, *Elmo1<sup>H/H</sup> Ins2<sup>+/+</sup>*; HHAKita, *Elmo1<sup>H/H</sup> Ins2<sup>Akita/+</sup>*; \*,  $P < 0.05$  vs. untreated (Untr) HHWT mice by Tukey-Kramer Honestly Significant Differences test after one-way ANOVA; †,  $P < 0.05$  vs. untreated HHAKita mice; ‡,  $P < 0.05$  vs. B12-treated HHAKita mice; TL, tibia length.

**Suppl. Fig. 4: Expression of apoptosis- and cardiomyopathy- associated genes and the parameters related to insulin-like growth factor (IGF)-1 signaling.**

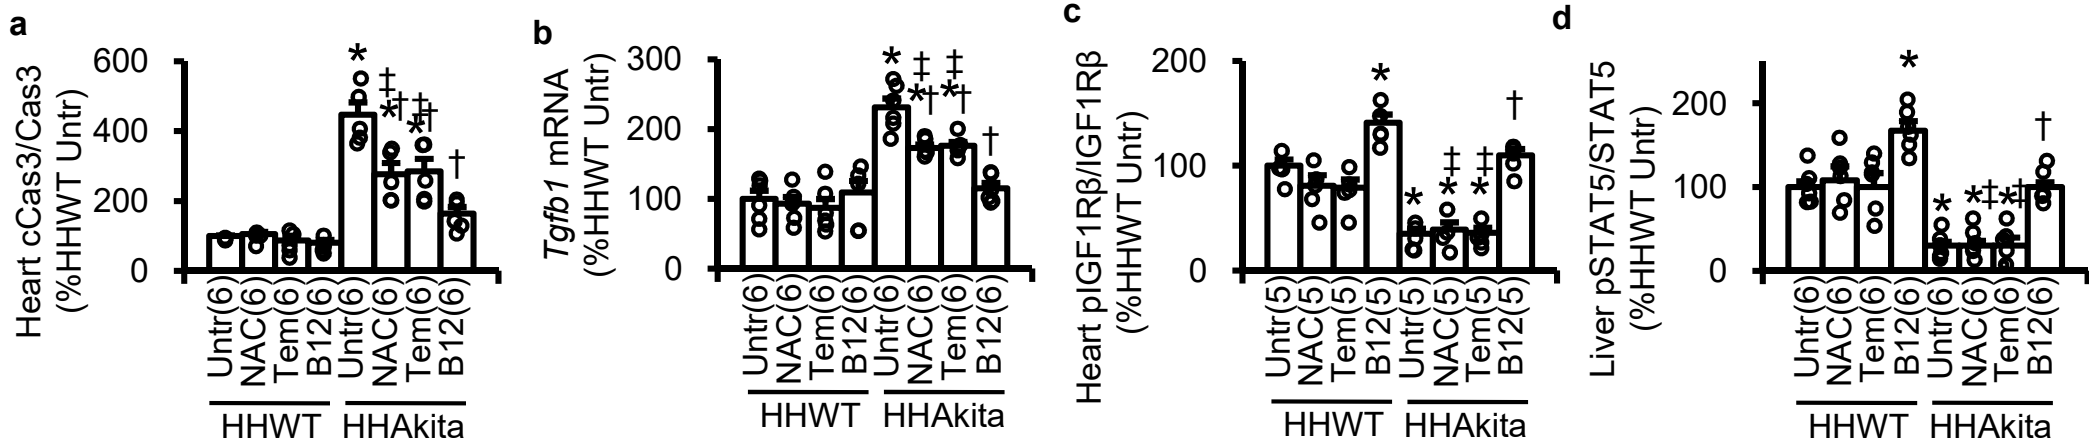

**a** Cardiac cleaved caspase 3 (cCas3) levels normalized by total Cas3 levels. **b** Cardiac *Tgfb1* mRNA levels normalized by  $\beta$ -actin mRNA levels. **c** Cardiac levels of phosphorylated IGF-1 receptor  $\beta$  (pIGF1R $\beta$ ) normalized by total IGF1R $\beta$  levels. **d** Hepatic phosphorylated pSTAT5 levels normalized by total STAT5 levels. The number of animals analyzed is given in each figure. HHWT, *Elmo1<sup>H/H</sup> Ins2<sup>+/+</sup>*; HHAkita, *Elmo1<sup>H/H</sup> Ins2<sup>Akita/+</sup>*; \*,  $P < 0.05$  vs. untreated (Untr) HHWT mice by Tukey-Kramer Honestly Significant Differences test after one-way ANOVA; †,  $P < 0.05$  vs. untreated HHAkita mice; ‡,  $P < 0.05$  vs. B12-treated HHAkita mice; NS, not significant.

Suppl. Fig. 5: DNMT's-SOCS1/3-IGF1 signaling mediates the cardioprotective effects of B12 in *Elmo1<sup>H/H</sup>Ins2<sup>Akita/+</sup>* (HHAkita) mice.

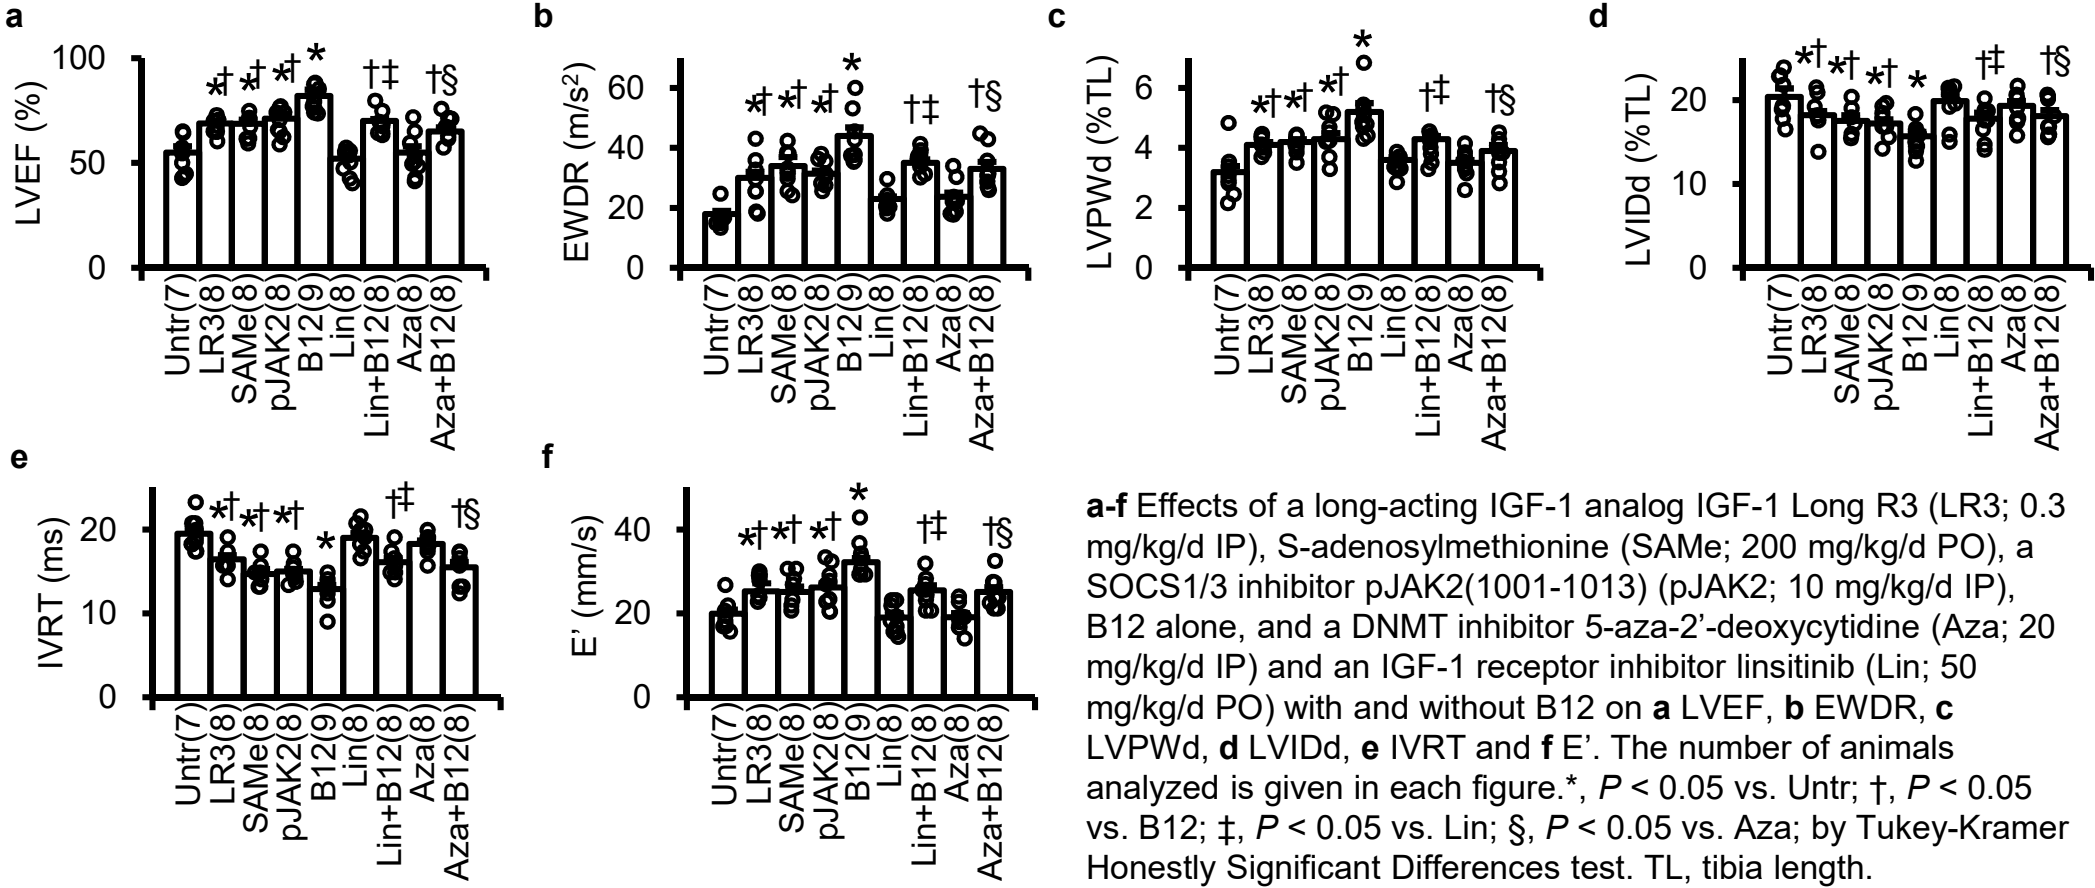

**a-f** Effects of a long-acting IGF-1 analog IGF-1 Long R3 (LR3; 0.3 mg/kg/d IP), S-adenosylmethionine (SAME; 200 mg/kg/d PO), a SOCS1/3 inhibitor pJAK2(1001-1013) (pJAK2; 10 mg/kg/d IP), B12 alone, and a DNMT inhibitor 5-aza-2'-deoxycytidine (Aza; 20 mg/kg/d IP) and an IGF-1 receptor inhibitor linsitinib (Lin; 50 mg/kg/d PO) with and without B12 on **a** LVEF, **b** EWDR, **c** LVPWd, **d** LVIDd, **e** IVRT and **f** E'. The number of animals analyzed is given in each figure. \*,  $P < 0.05$  vs. Untr; †,  $P < 0.05$  vs. B12; ‡,  $P < 0.05$  vs. Lin; §,  $P < 0.05$  vs. Aza; by Tukey-Kramer Honestly Significant Differences test. TL, tibia length.

Suppl. Fig. 6: DNMT's-SOCS1/3-IGF1 signaling mediates the cardioprotective effects of B12 in *Elmo1<sup>HH</sup> Ins2<sup>Akita/+</sup>* (HHAkita) mice.

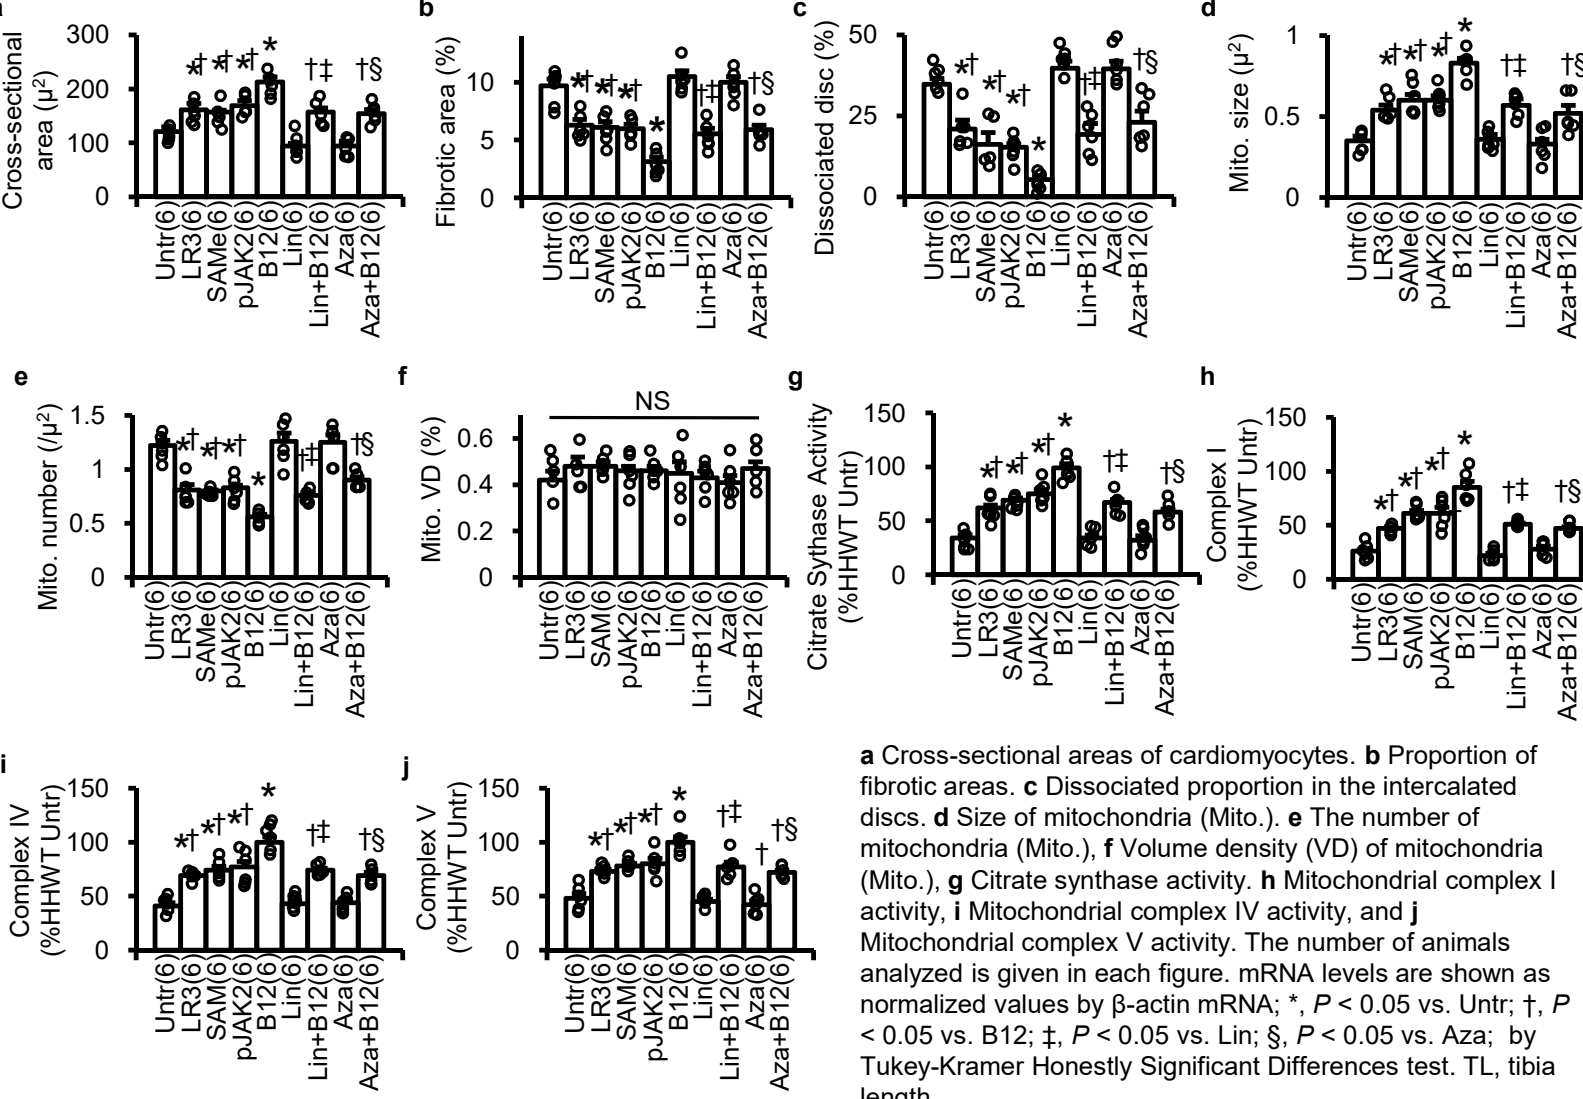

**a** Cross-sectional areas of cardiomyocytes. **b** Proportion of fibrotic areas. **c** Dissociated proportion in the intercalated discs. **d** Size of mitochondria (Mito.). **e** The number of mitochondria (Mito.), **f** Volume density (VD) of mitochondria (Mito.), **g** Citrate synthase activity. **h** Mitochondrial complex I activity, **i** Mitochondrial complex IV activity, and **j** Mitochondrial complex V activity. The number of animals analyzed is given in each figure. mRNA levels are shown as normalized values by  $\beta$ -actin mRNA; \*,  $P < 0.05$  vs. Untr; †,  $P < 0.05$  vs. B12; ‡,  $P < 0.05$  vs. Lin; §,  $P < 0.05$  vs. Aza; by Tukey-Kramer Honestly Significant Differences test. TL, tibia length.

**Suppl. Fig. 7: Uncropped immunoblot images.**

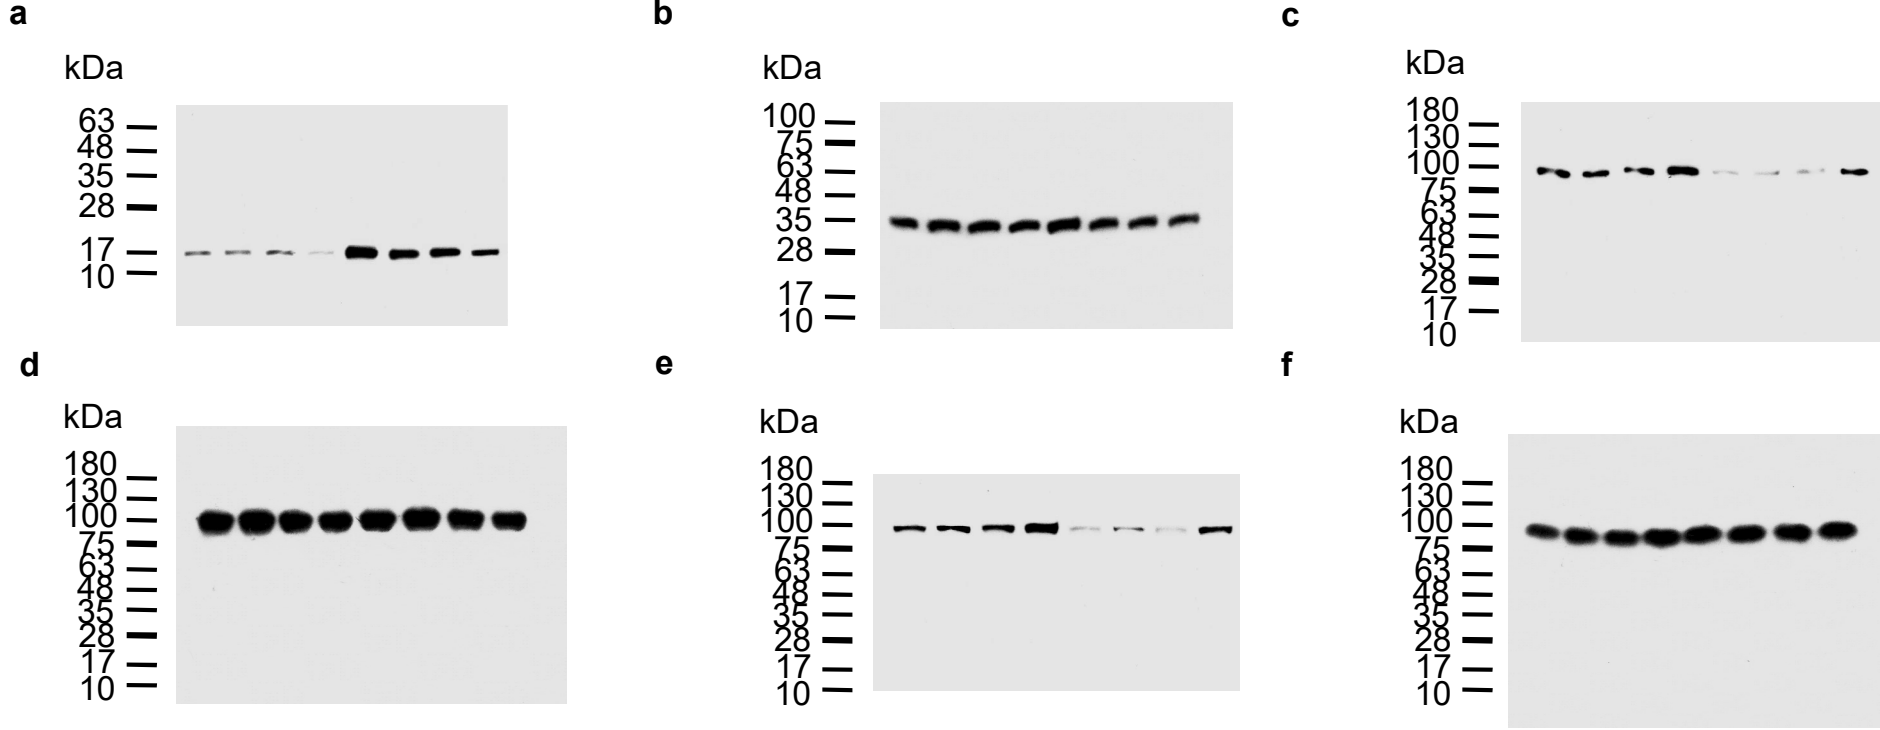

**a** Cardiac cleaved caspase 3 (cCas3). **b** Cardiac total caspase 3 (Cas3). **c** Cardiac phosphorylated IGF-1 receptor  $\beta$  (pIGF1R $\beta$ ). **d** Cardiac total IGF1R $\beta$ . **e** Hepatic phosphorylated pSTAT5. **f** Hepatic total STAT5.
