# Supplementary material for: Cyanocobalamin prevents cardiomyopathy in type 1 diabetes by modulating oxidative stress and DNMT-SOCS1/3-IGF-1 signaling
Source: PubMed Central journal article supplement (PMC8222371; doi:10.1038/s42003-021-02291-y), 2021-06-23
Supplement: 42003_2021_2291_MOESM3_ESM.pdf [file 42003_2021_2291_MOESM3_ESM.pdf]

## **Description of Additional Supplementary Files**

**File name:** Supplementary data 1

**Description:** Basic characteristics in experimental groups.

**File name:** Supplementary data 2

**Description:** Source Data.
